# Supplementary material for: A dual-functional 8-hydroxyquinoline fluorescent probe for simultaneous detection of solvent microenvironments and trace water in organic media
Source: Royal Society of Chemistry journal article supplement (doi:10.1039/d5ay01702e), 2025-12-02
Supplement: d5ay01702e1.pdf [file d5ay01702e1.pdf]

## **Dual-Functional 8-Hydroxyquinoline Fluorescent Probe for Simultaneous Detection of Solvent Microenvironments and Trace Water in Organic Media**

K. M. Meghna,<sup>a§</sup> M. M. Akhil Kumar,<sup>a§</sup> Sunandan Sarkar <sup>a</sup>, V. M. Biju <sup>\*a</sup>

<sup>§</sup>Both authors contributed equally

<sup>a</sup>Department of Chemistry, National Institute of Technology, Tiruchirappalli, Tamil Nadu, India- 620015

E-mail: [ymbiju@nitt.edu](mailto:ymbiju@nitt.edu)

## SUPPORTING INFORMATION

### Table of Contents

| Figure No. | Contents                                                                                                                                                                                        | Page No. |
|------------|-------------------------------------------------------------------------------------------------------------------------------------------------------------------------------------------------|----------|
| S1         | <sup>1</sup> H-NMR spectrum of BDN                                                                                                                                                              | 4        |
| S2         | <sup>13</sup> C-NMR spectrum of BDN                                                                                                                                                             | 4        |
| S3         | <sup>1</sup> H-NMR spectrum of DBNA                                                                                                                                                             | 5        |
| S4         | <sup>13</sup> C-NMR spectrum of DBNA                                                                                                                                                            | 5        |
| S5         | HRMS spectrum of DBNA                                                                                                                                                                           | 6        |
| S6         | <sup>1</sup> H-NMR spectrum of DBIMHQ                                                                                                                                                           | 6        |
| S7         | <sup>13</sup> C-NMR spectrum of DBIMHQ                                                                                                                                                          | 7        |
| S8         | HRMS spectrum of DBIMHQ                                                                                                                                                                         | 7        |
| S9         | FT-IR spectrum of DBIMHQ                                                                                                                                                                        | 8        |
| S10        | <sup>1</sup> H-NMR spectrum of DBIMMQ                                                                                                                                                           | 8        |
| S11        | <sup>13</sup> C-NMR spectrum of DBIMMQ                                                                                                                                                          | 9        |
| S12        | HRMS spectrum of DBIMMQ                                                                                                                                                                         | 9        |
| S13        | UV-visible absorption spectra of DBIMHQ with increasing water content (A) THF, (B) Acetone, (C) ACN, (D) EtOH                                                                                   | 10       |
| S14        | Normalized fluorescence emission spectra of DBIMHQ in (A) Acetone, (B) ACN, (C) DMSO, (D) EtOH                                                                                                  | 10       |
| S15        | Fluorescence emission spectra of DBIMHQ at higher water contents (A) THF, (B) Acetone, (C) ACN                                                                                                  | 11       |
| S16        | (A) Fluorescence emission spectra of DBIMHQ in DMSO, (B) Plot of fluorescence intensity vs water content in DMSO                                                                                | 11       |
| S17        | (A) Fluorescence emission spectra of DBIMHQ in EtOH, (B) Plot of fluorescence intensity vs water content in EtOH                                                                                | 12       |
| S18        | (A) Fluorescence emission spectra of DBIMMQ in THF with increasing water content and (B) Plot of fluorescence intensity vs water content in THF                                                 | 12       |
| S19        | DLS-based particle size analysis of DBIMHQ (1 μM) in (a) 10% H <sub>2</sub> O-THF and (b) 50% H <sub>2</sub> O-THF                                                                              | 13       |
| S20        | DFT study for geometric optimisation and energy calculation                                                                                                                                     | 13       |
| S21        | (A) Stern-Volmer plot for fluorescence intensity in THF solvent with the addition of water, and (B) Stern-Volmer plot for fluorescence intensity in acetone solvent with the addition of water. | 14       |
| S22        | (A) Stern-Volmer plot for lifetime in THF solvent with the addition of water, and (B) Stern-Volmer plot for lifetime in acetone solvent with the addition of water.                             | 14       |
| S23        | (A) Stern-Volmer plot combining fluorescence intensity and lifetime measurements with increasing water concentration (A) THF solvent                                                            | 15       |

|     |                                                                                                                                                                              |    |
|-----|------------------------------------------------------------------------------------------------------------------------------------------------------------------------------|----|
|     | and (B) Acetone solvent.                                                                                                                                                     |    |
| S24 | Temperature sensitivity of DBIMHQ in pure THF solvent.                                                                                                                       | 15 |
| S25 | Non-metal interference study for DBIMHQ (1 $\mu$ M) in THF with 5% water (A) EDTA masking control for metal ions and (B) Incremental addition of ethanol to THF solvent.     | 15 |
| S26 | Non-metal interference study for DBIMHQ (1 $\mu$ M) in THF with 5% water (A) Acid contaminants and (B) Base contaminants.                                                    | 16 |
| S27 | Quantitative analysis of water in real samples (A) Honey, (B) Salt, and (C) Sugar.                                                                                           | 16 |
| S28 | (A) Fluorescence emission spectra of chitosan thin film in THF solvent with increasing water content, and (B) Plot of fluorescence intensity vs water content in THF.        | 17 |
| S29 | (A) Response time analysis of chitosan thin film in THF: water mixture at various time intervals, and (B) Stability studies of chitosan thin film THF-water solvent mixture. | 17 |
| S30 | <sup>1</sup> H NMR spectrum of DBIMHQ in the presence of NaOH.                                                                                                               | 17 |

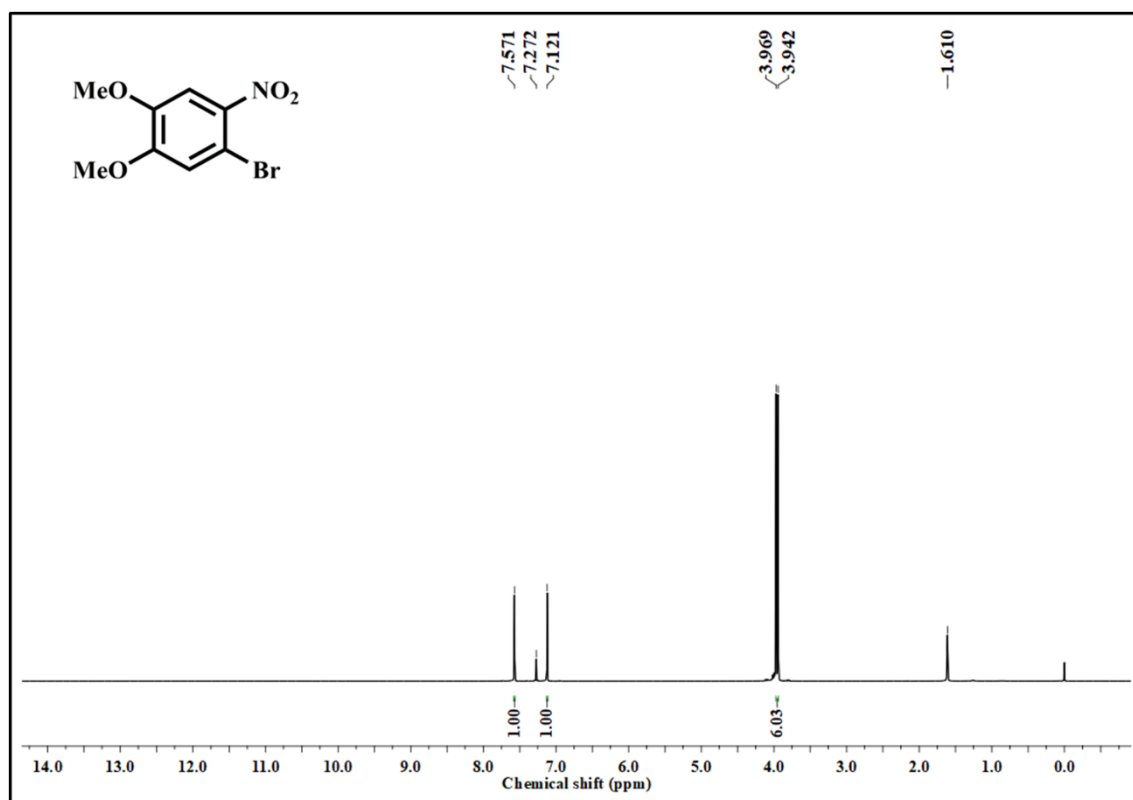

**Fig. S1** <sup>1</sup>H-NMR spectrum of BDN

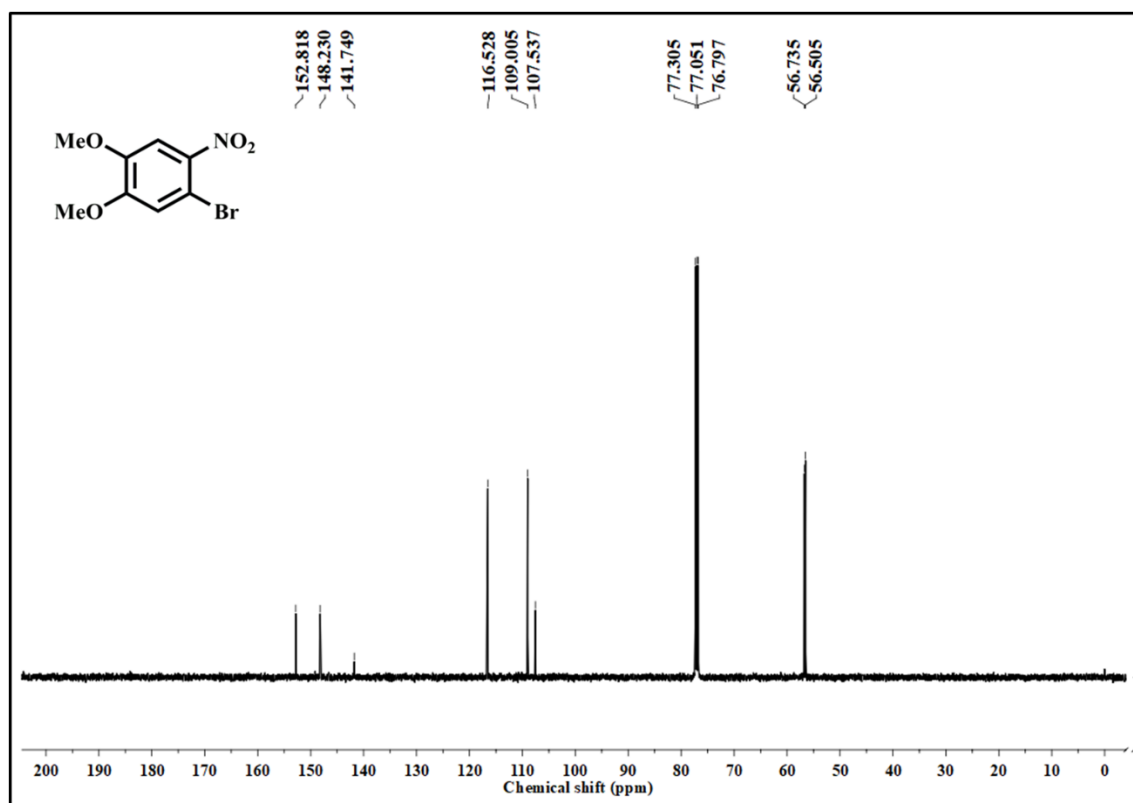

**Fig. S2** <sup>13</sup>C-NMR spectrum of BDN

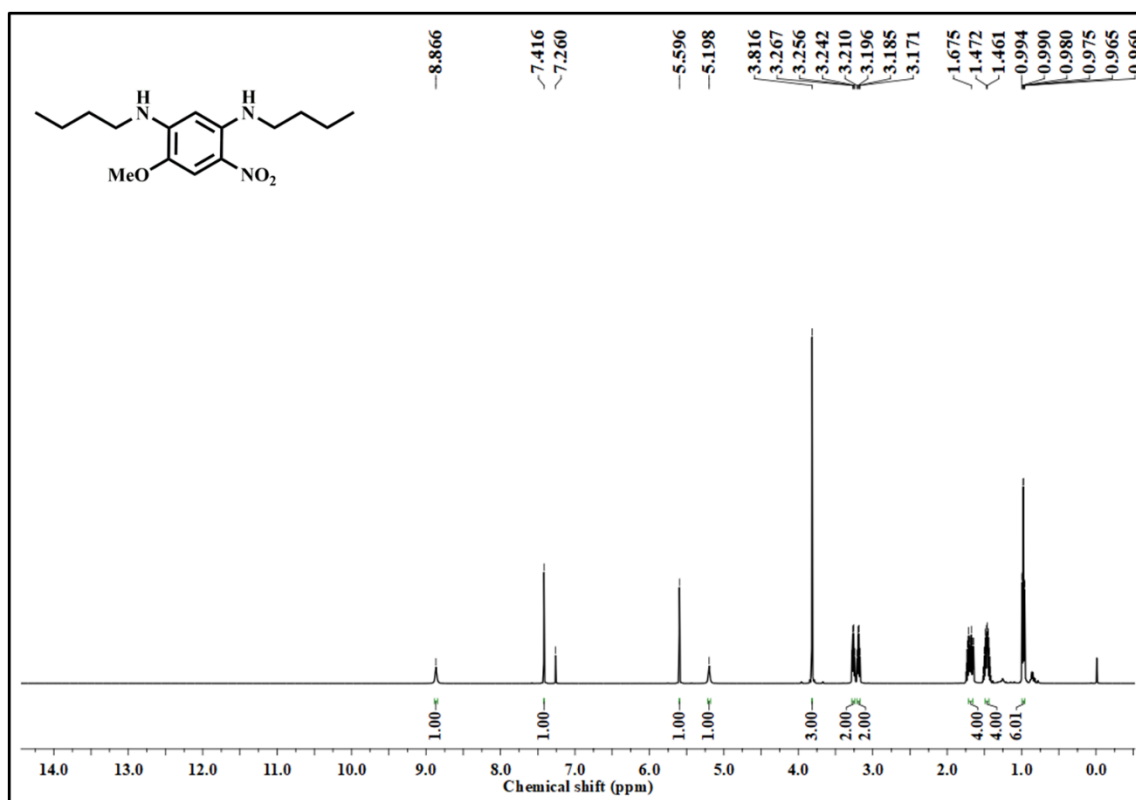

**Fig. S3** <sup>1</sup>H-NMR spectrum of DBNA

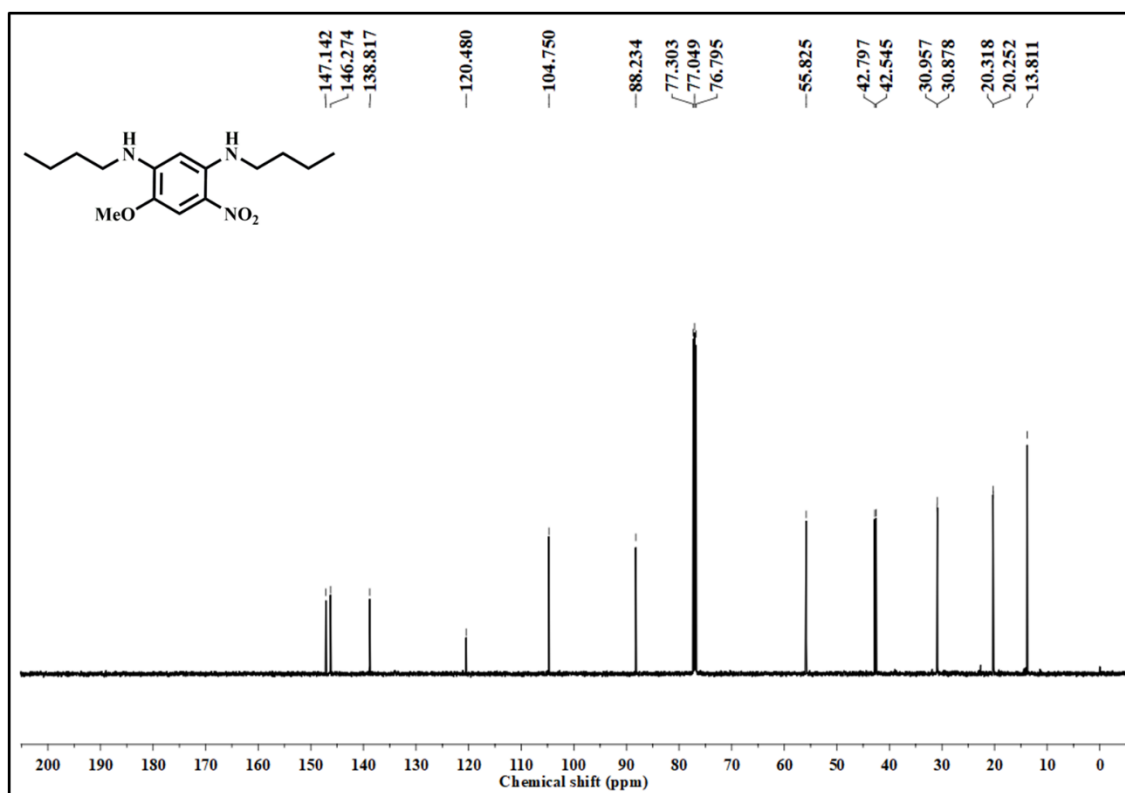

**Fig. S4** <sup>13</sup>C-NMR spectrum of DBNA

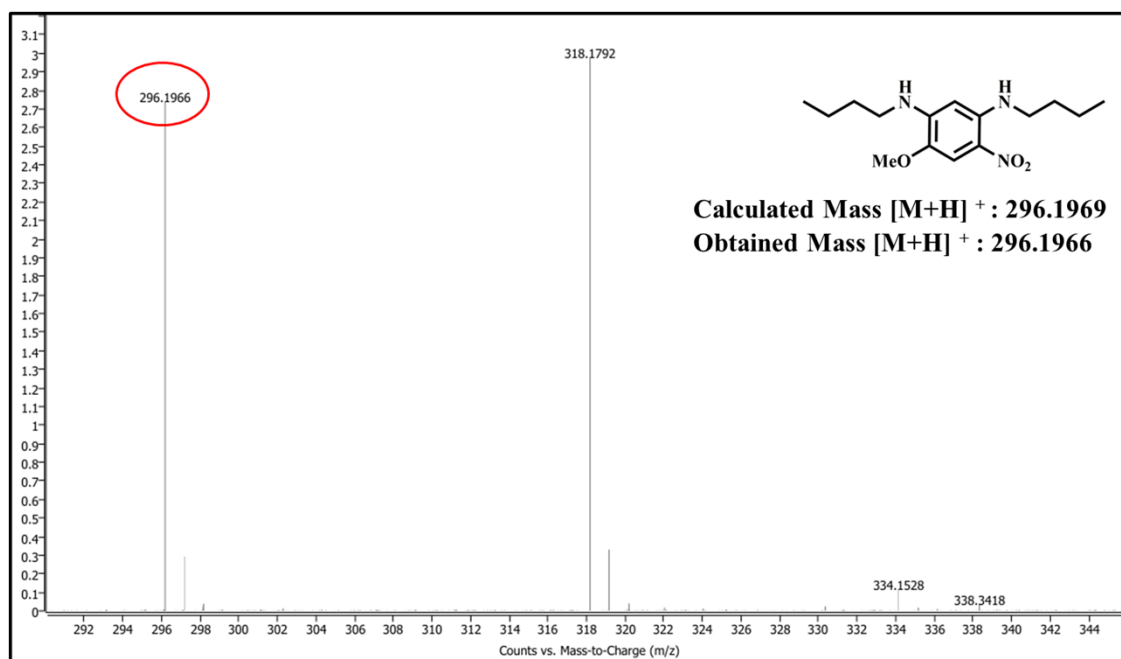

Fig. S5 HRMS spectrum of DBNA

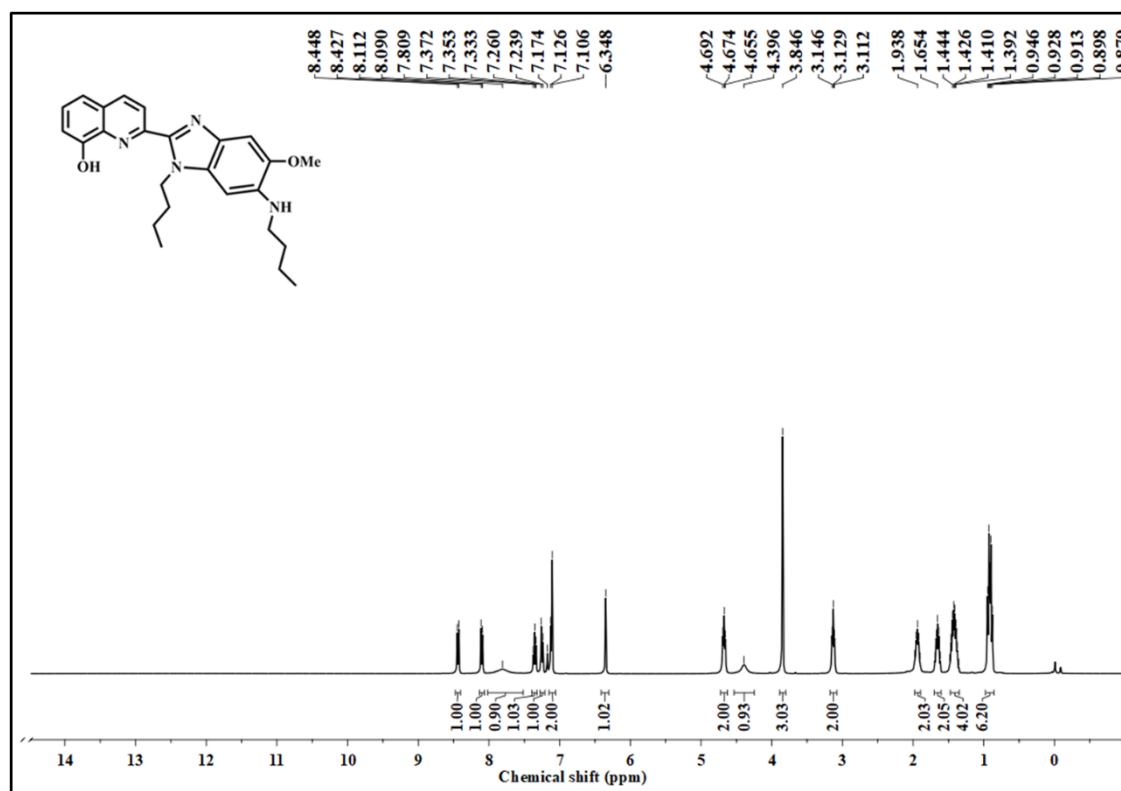

Fig. S6  $^1H$  NMR spectrum of DBIMHQ

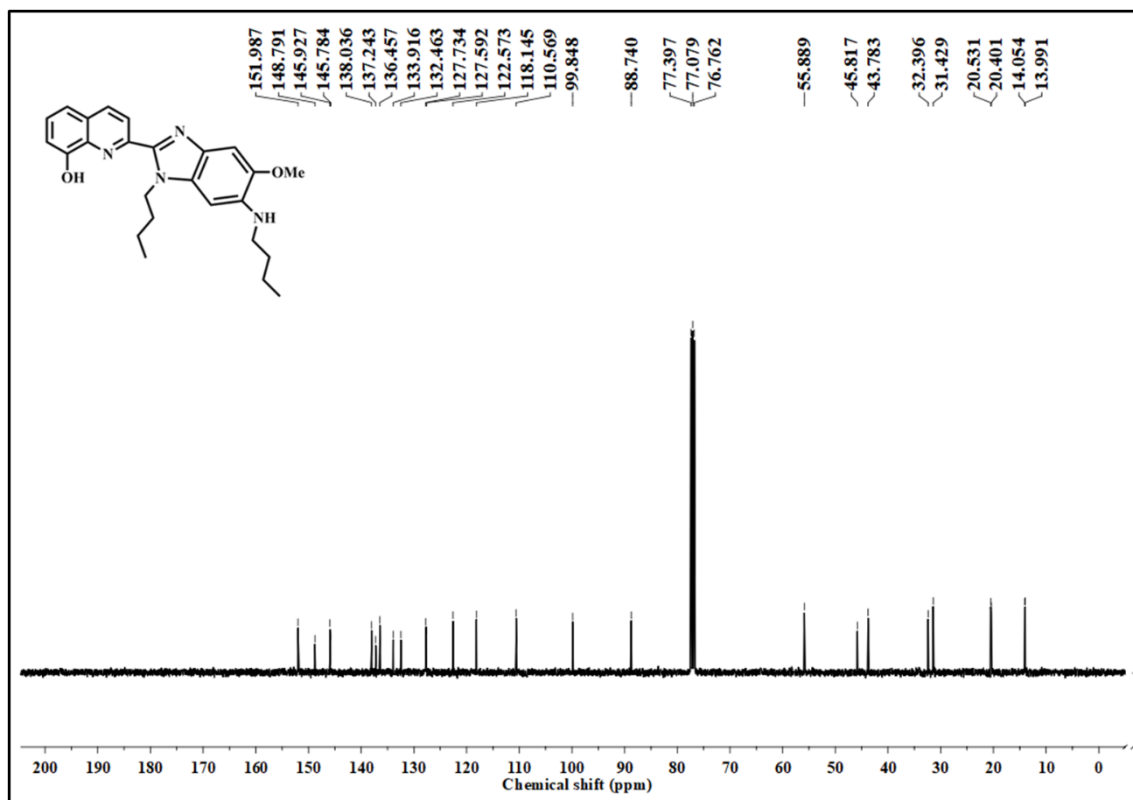

**Fig. S7**  $^{13}\text{C}$  NMR spectrum of DBIMHQ

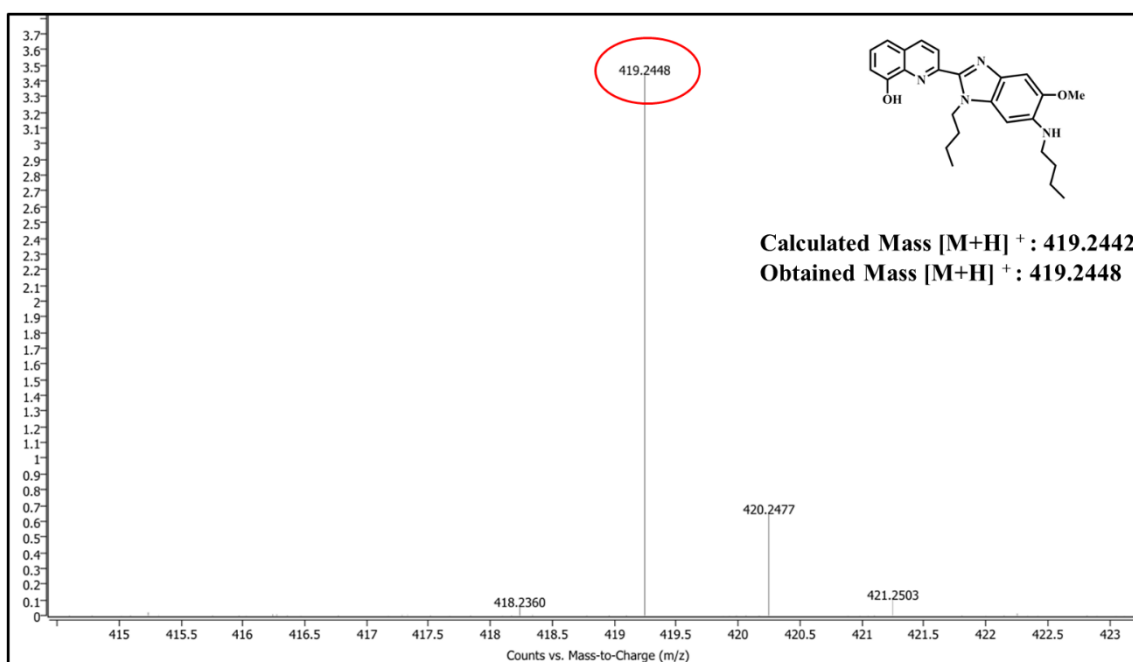

**Fig. S8** HRMS spectrum of DBIMHQ

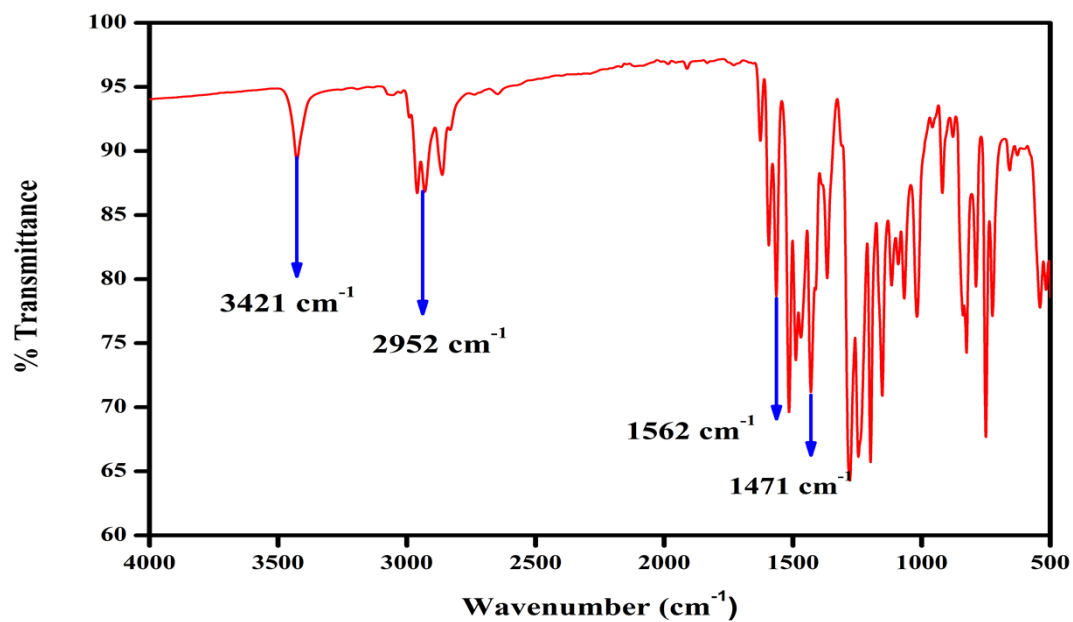

**Fig. S9** FT-IR spectrum of DBIMHQ

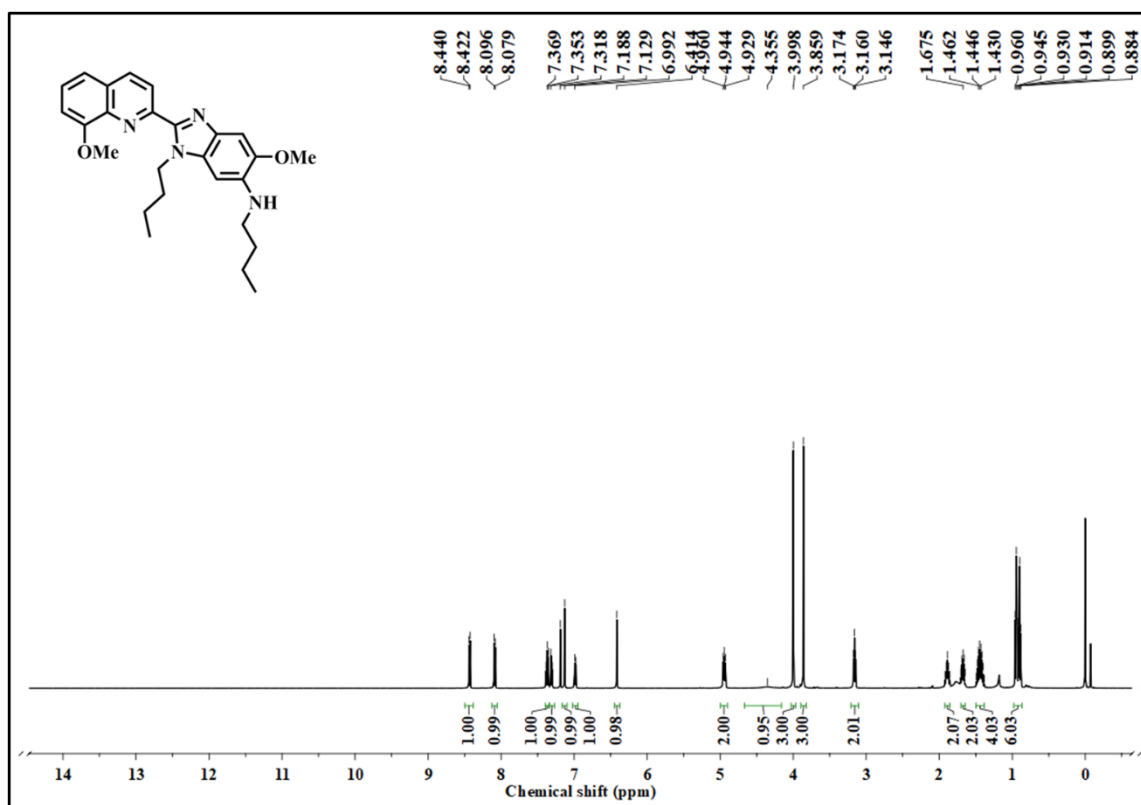

**Fig. S10** <sup>1</sup>H NMR spectrum of DBIMMQ



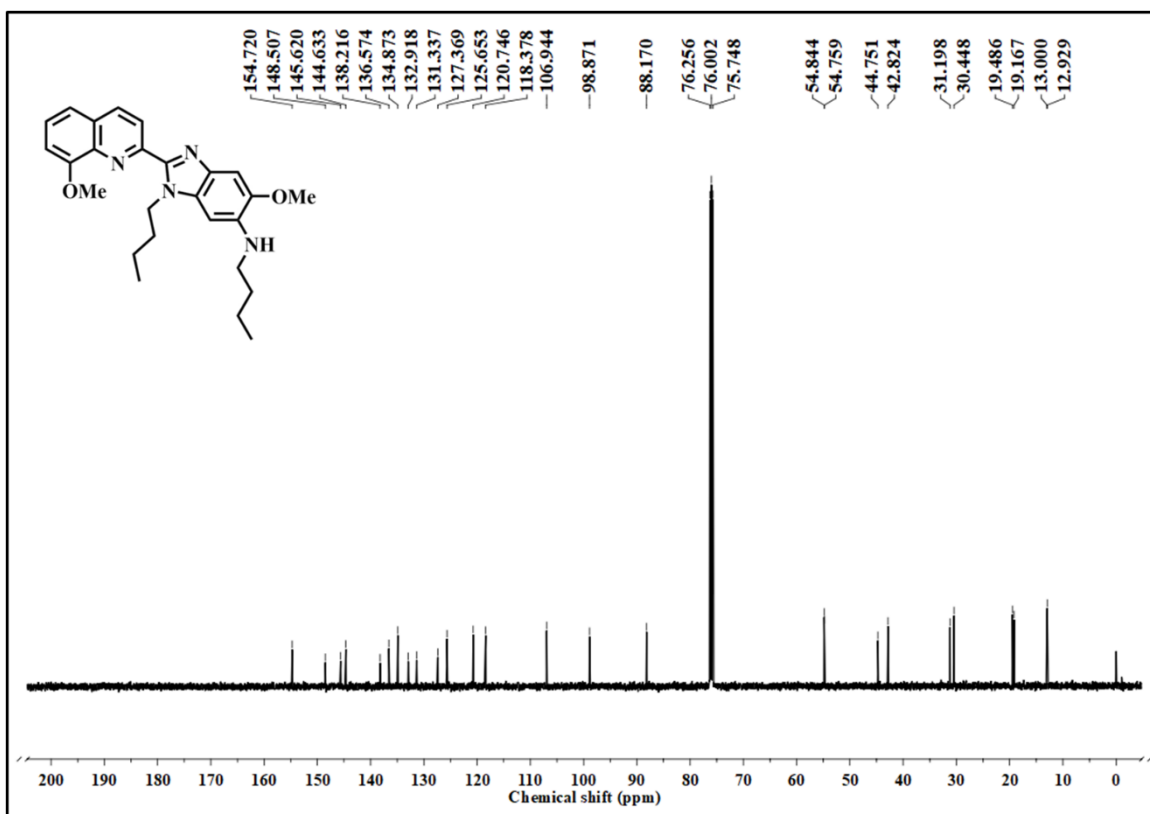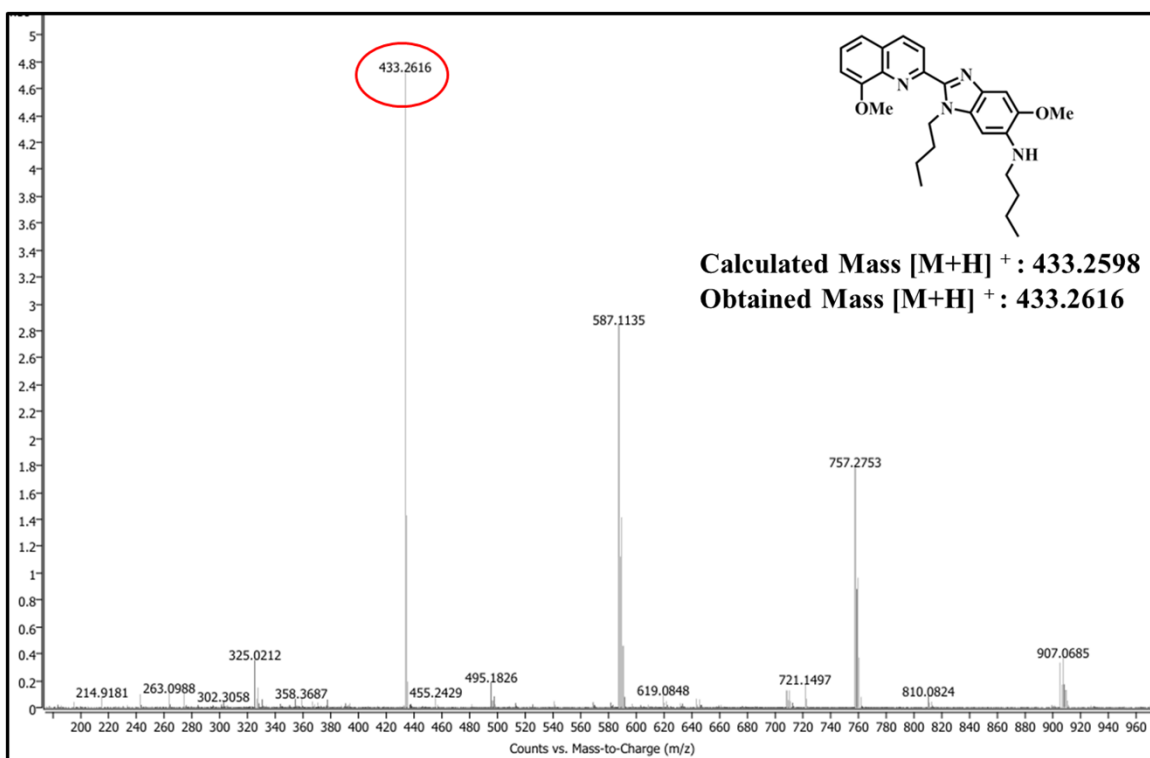

Fig. S11 <sup>13</sup>C NMR spectrum of DBIMMQ

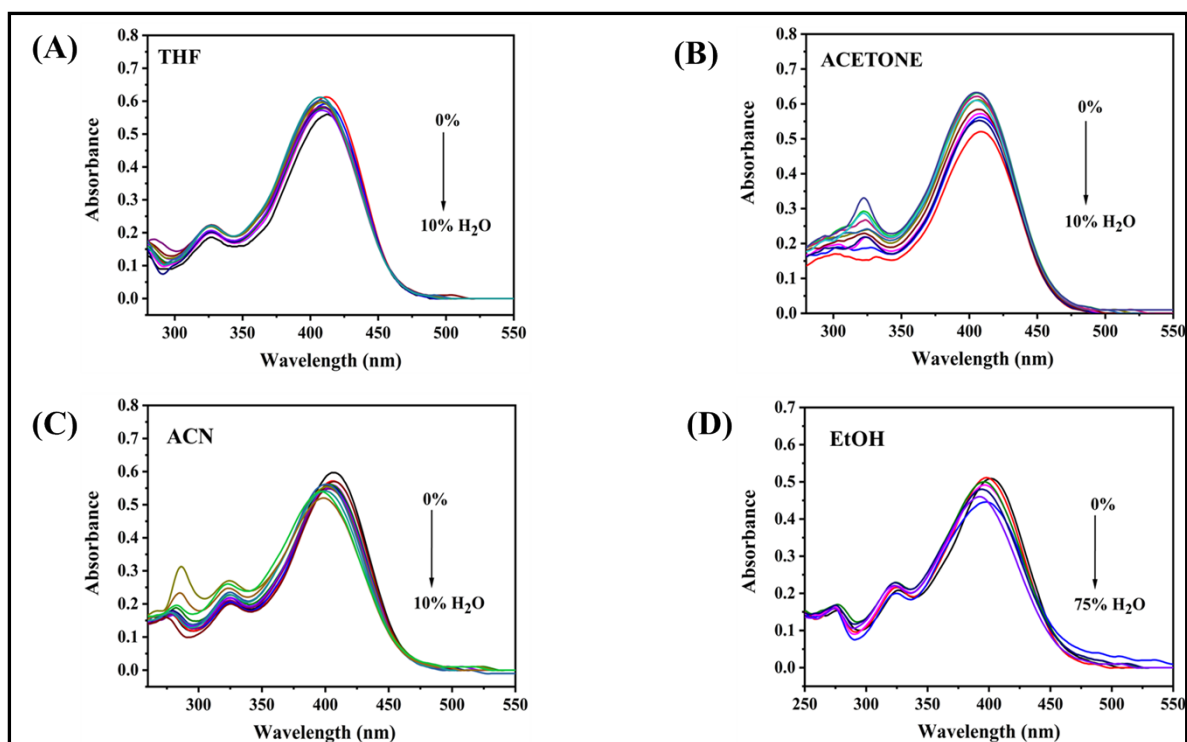

**Fig. S12** HRMS spectrum of DBIMMQ

**Fig. S13** UV-visible absorption spectra of DBIMHQ with increasing water content (A) THF,

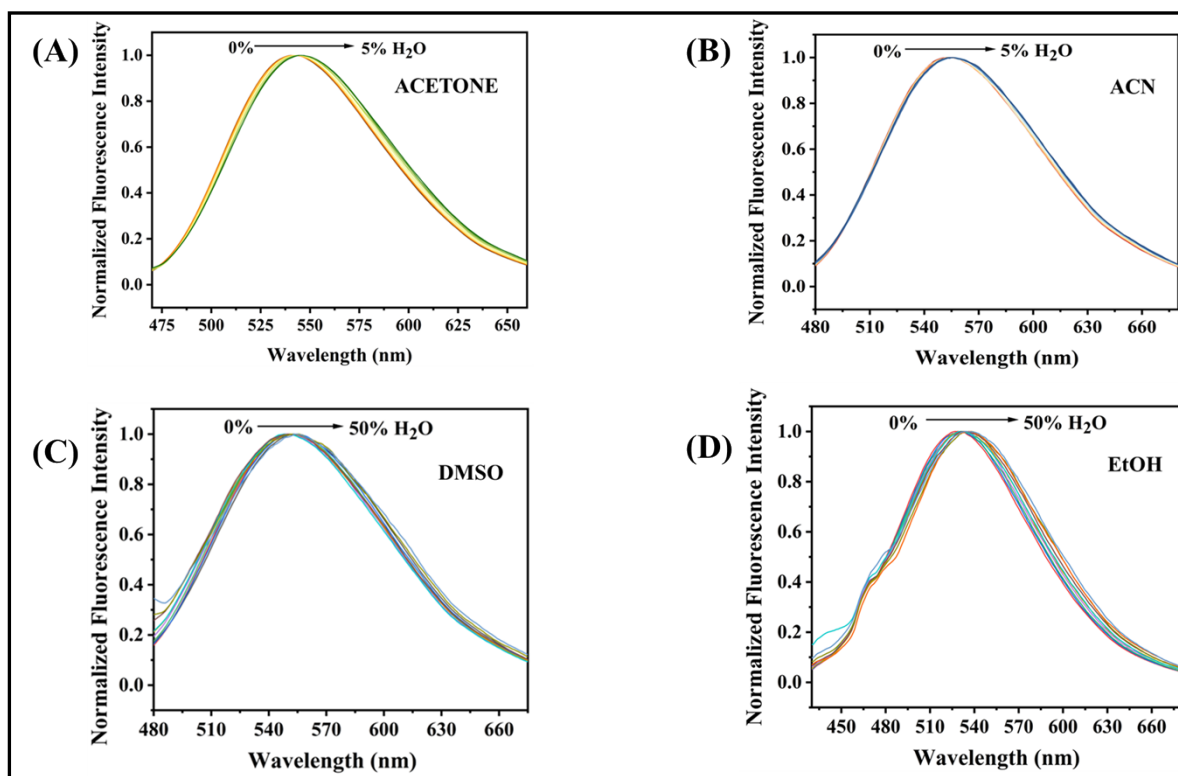

(B) Acetone, (C) ACN, (D) EtOH.

**Fig. S14** Normalized fluorescence emission spectra of DBIMHQ in (A) Acetone, (B) ACN, (C) DMSO, (D) EtOH

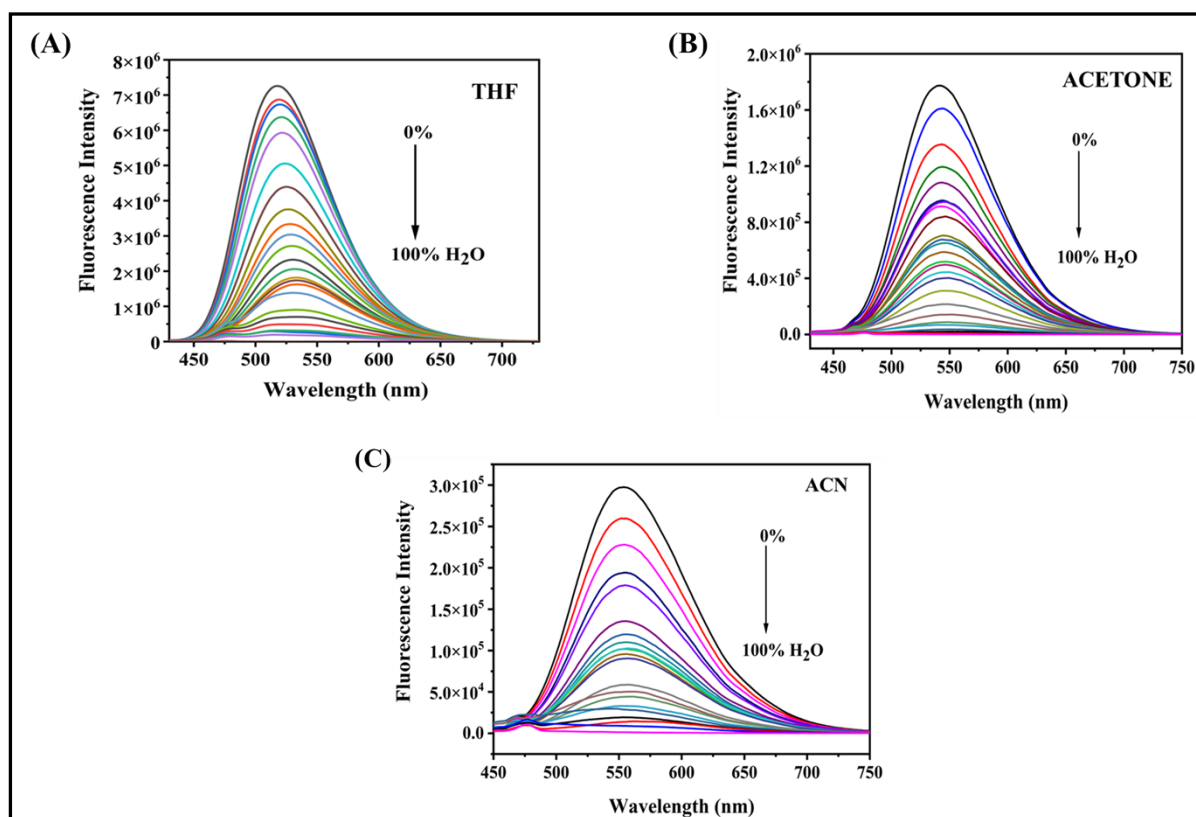

**Fig. S15** Fluorescence emission spectra of DBIMHQ at higher water contents (A) THF, (B) Acetone, (C) ACN.

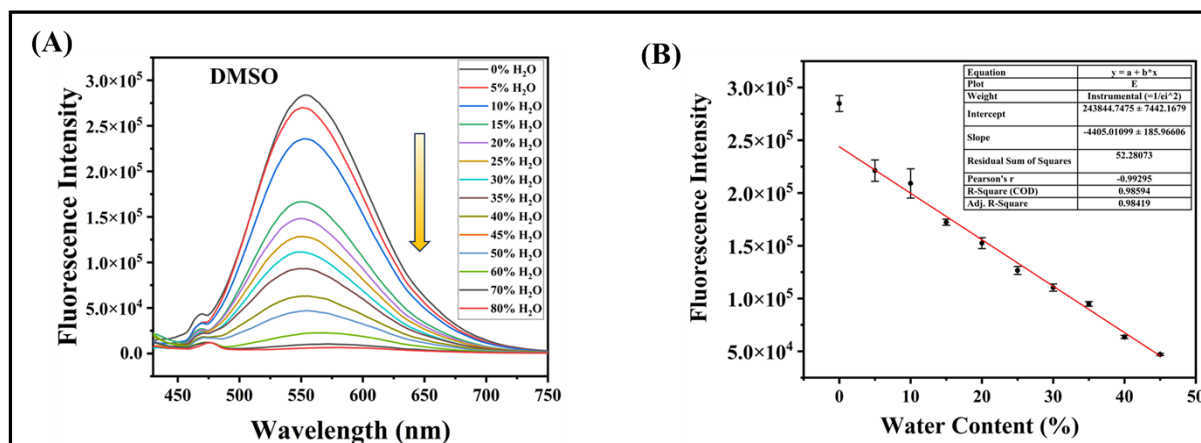

**Fig. S16** (A) Fluorescence emission spectra of DBIMHQ in DMSO, (B) Plot of fluorescence intensity vs water content in DMSO.

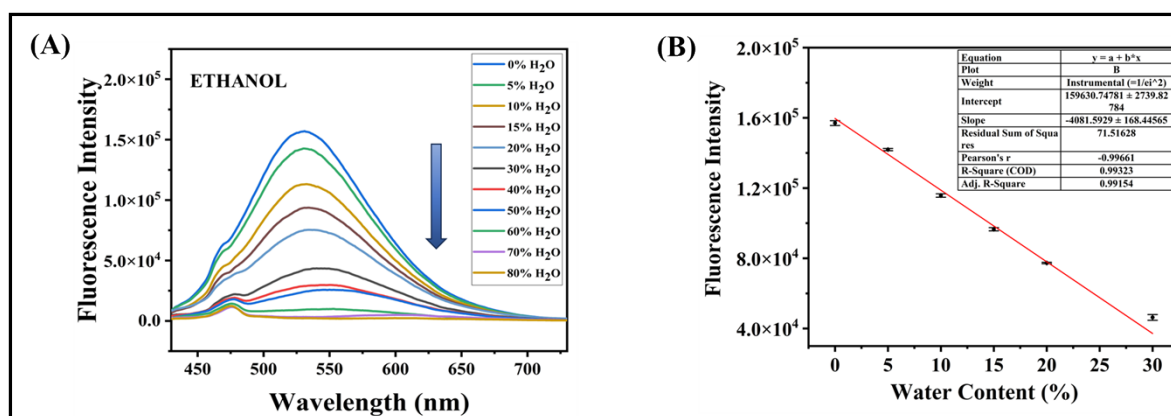

**Fig. S17** (A) Fluorescence emission spectra of DBIMHQ in EtOH, (B) Plot of fluorescence intensity vs water content in EtOH.

**Table S1.** Relative Quantum yield calculation for DBIMHQ

| Sample | Excitation Wavelength | QY <sub>s</sub> | A <sub>s</sub>     | F <sub>s</sub> | $\eta_s$ | A <sub>x</sub>     | F <sub>x</sub> | $\eta_x$ | QY <sub>x</sub> |
|--------|-----------------------|-----------------|--------------------|----------------|----------|--------------------|----------------|----------|-----------------|
| DBIMHQ | 410 nm                | 0.577           | $1.16 \times 10^9$ | 0.08           | 1.33     | $4.10 \times 10^8$ | 0.06           | 1.407    | 0.304           |

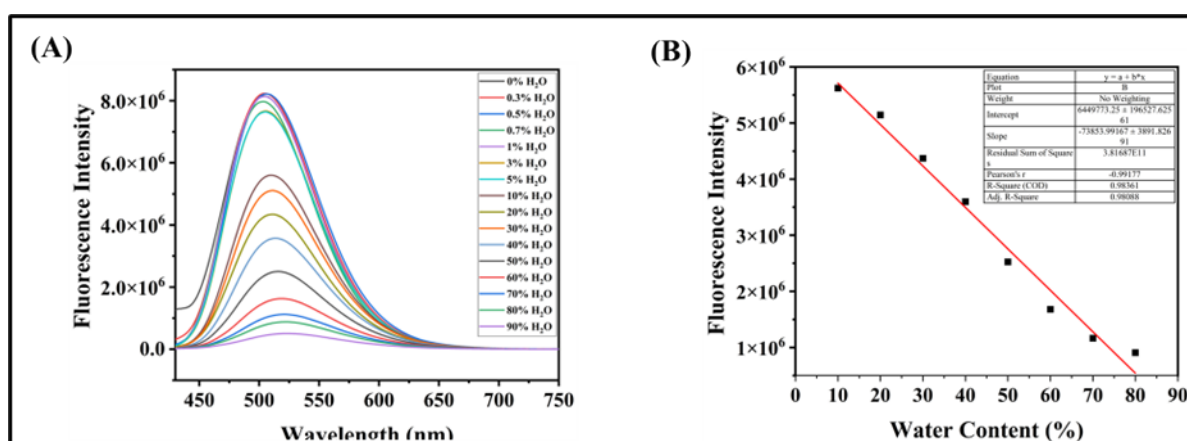

**Fig. S18** (A) Fluorescence emission spectra of DBIMMQ in THF with increasing water content and (B) Plot of fluorescence intensity vs water content in THF.

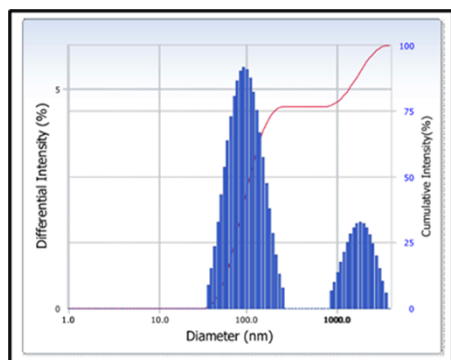

(a)  $Z_{avg} = 248.8 \text{ nm}$   
PDI = 0.199

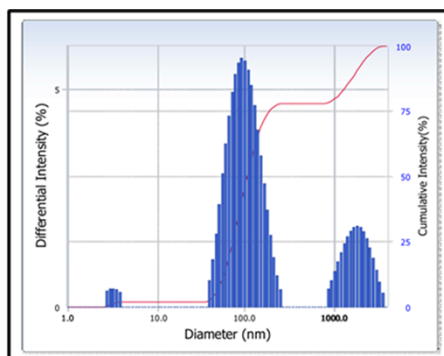

(b)  $Z_{avg} = 253.7 \text{ nm}$   
PDI = 0.191

**Fig. S19** DLS-based particle size analysis of DBIMHQ (1 $\mu$ M) in (a) 10% H<sub>2</sub>O-THF and (b) 50% H<sub>2</sub>O-THF.

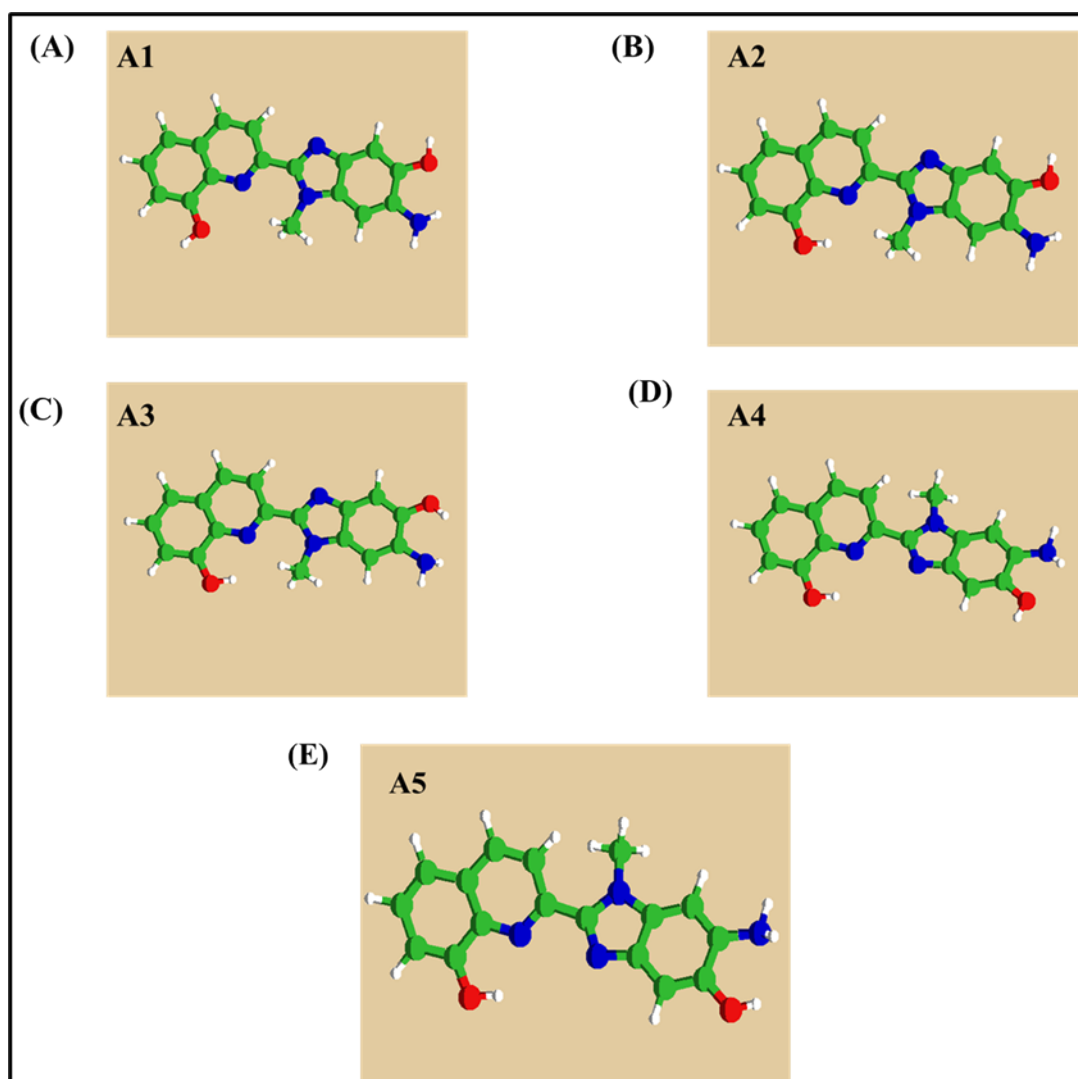

**Fig. S20** DFT study for geometric optimisation and energy calculation.

**Table S2.** Relative energy of various conformers of DBIMHQ

| Conformer | Electronic Energy (kcal/mol) |
|-----------|------------------------------|
| A1        | 4.10                         |
| A2        | 0                            |
| A3        | 1.14                         |
| A4        | 3.09                         |
| A5        | 4.10                         |

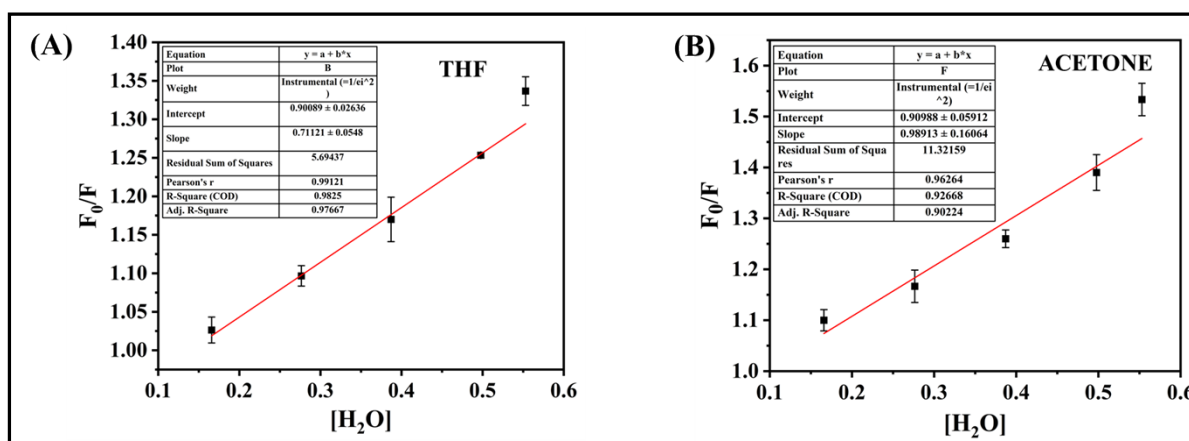

**Fig. S21** (A) Stern-Volmer plot for fluorescence intensity in THF solvent with the addition of water, and (B) Stern-Volmer plot for fluorescence intensity in acetone solvent with the addition of water.

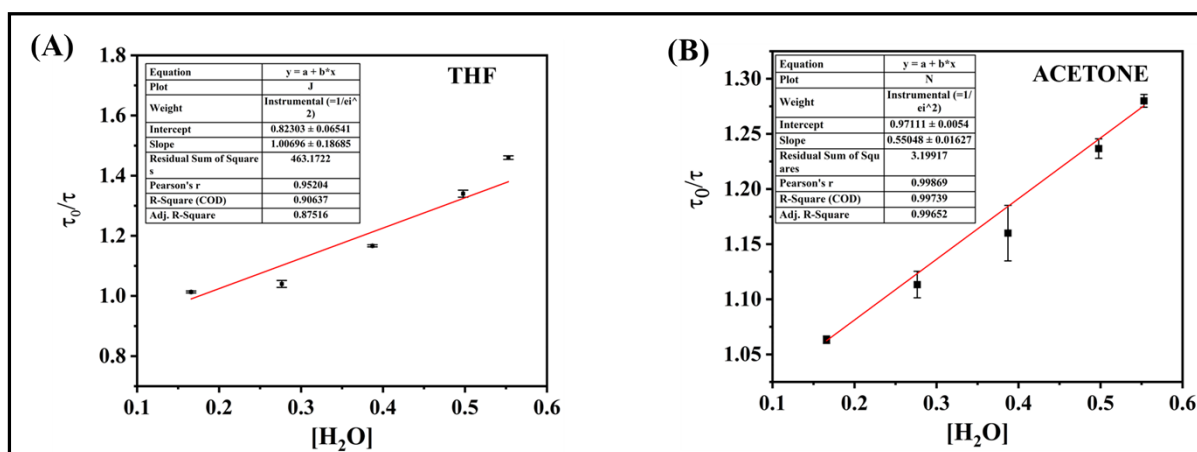

**Fig. S22** (A) Stern-Volmer plot for lifetime in THF solvent with the addition of water, and (B) Stern-Volmer plot for lifetime in acetone solvent with the addition of water.

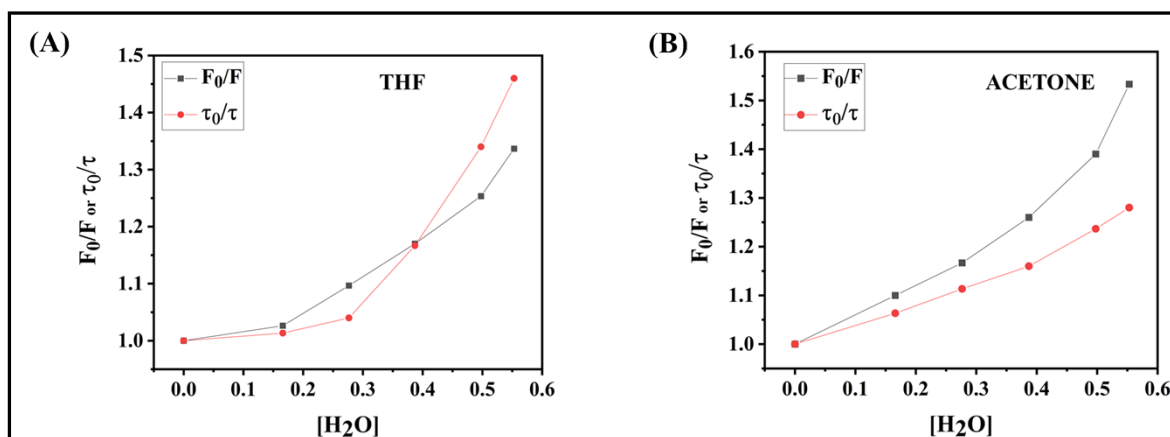

**Fig. S23** (A) Stern-Volmer plot combining fluorescence intensity and lifetime measurements with increasing water concentration (A) THF solvent and (B) Acetone solvent.

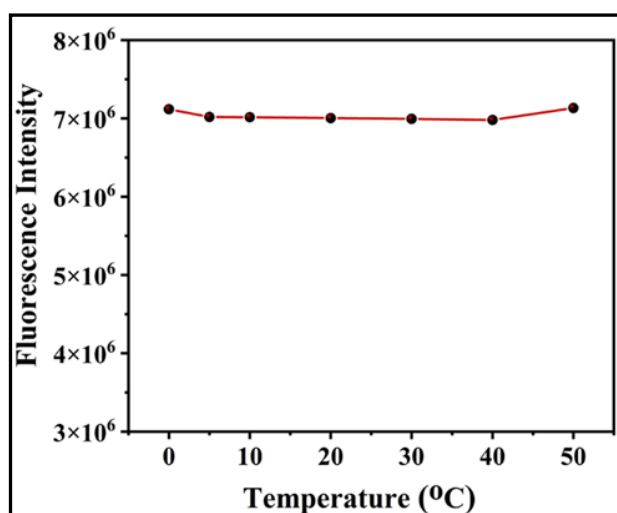

**Fig. S24** Temperature sensitivity of DBIMHQ in pure THF solvent.

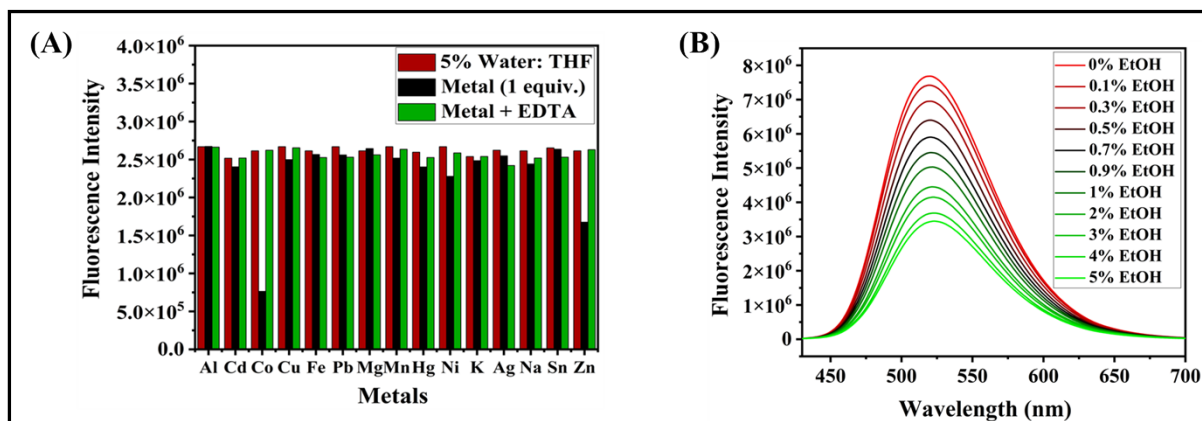

**Fig. S25** Non-metal interference study for DBIMHQ (1 $\mu$ M) in THF with 5% water (A) EDTA masking control for metal ions and (B) Incremental addition of ethanol to THF solvent.

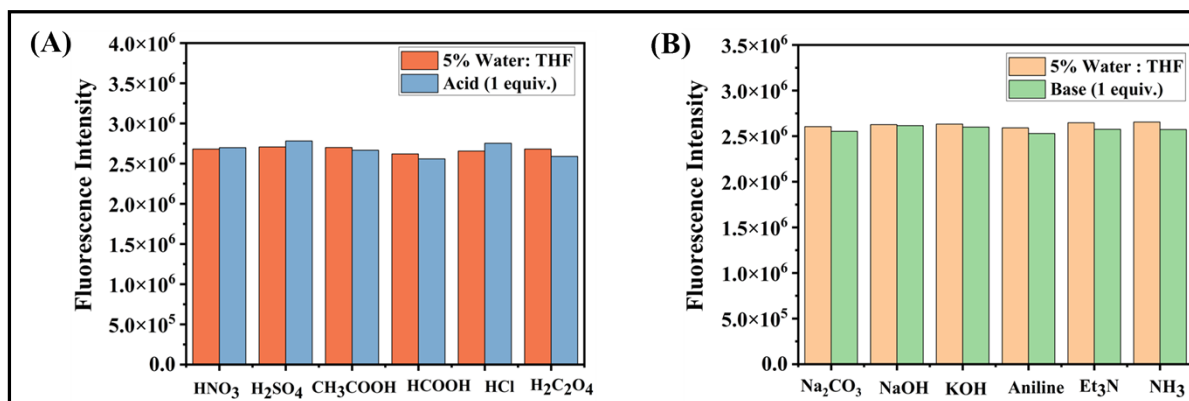

**Fig. S26** Non-metal interference study for DBIMHQ (1 $\mu$ M) in THF with 5% water (A) Acid contaminants and (B) Base contaminants.

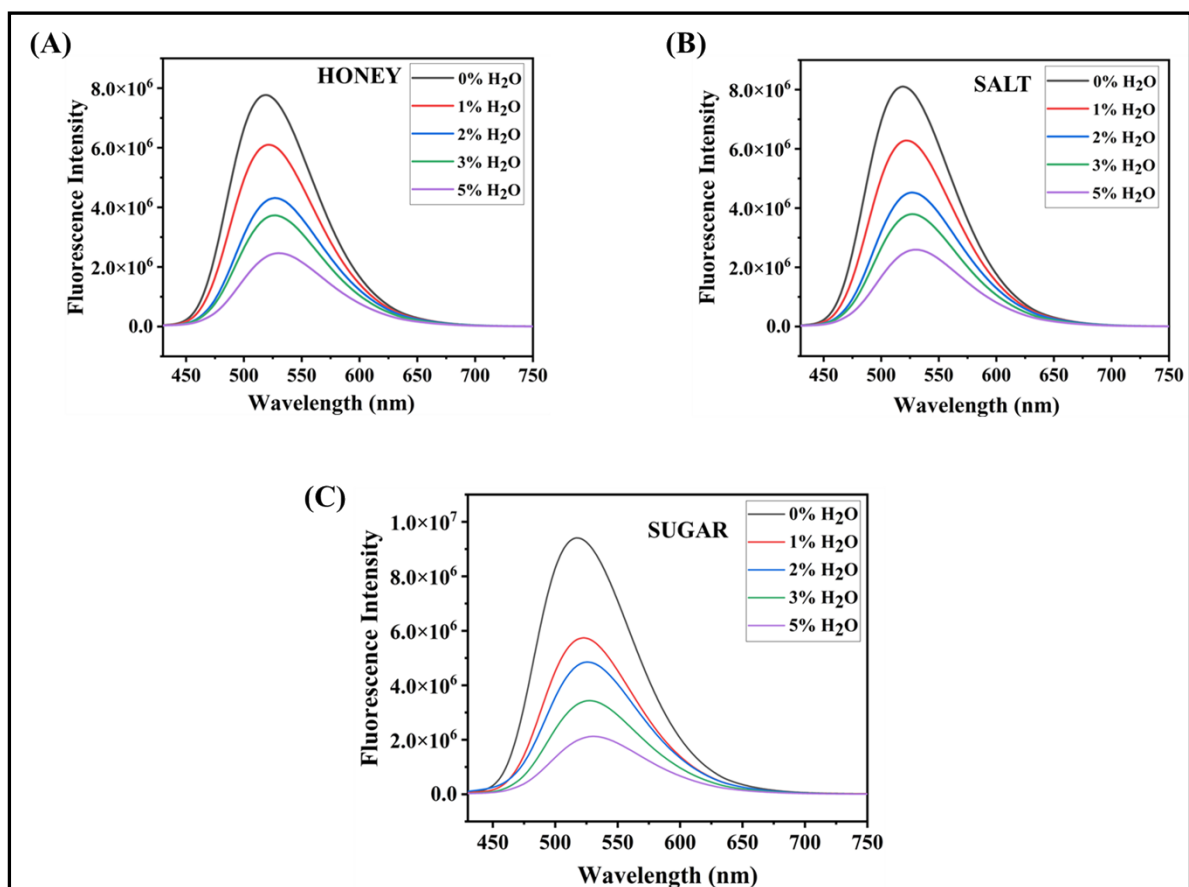

**Fig. S27** Quantitative analysis of water in real samples (A) Honey, (B) Salt, and (C) Sugar.



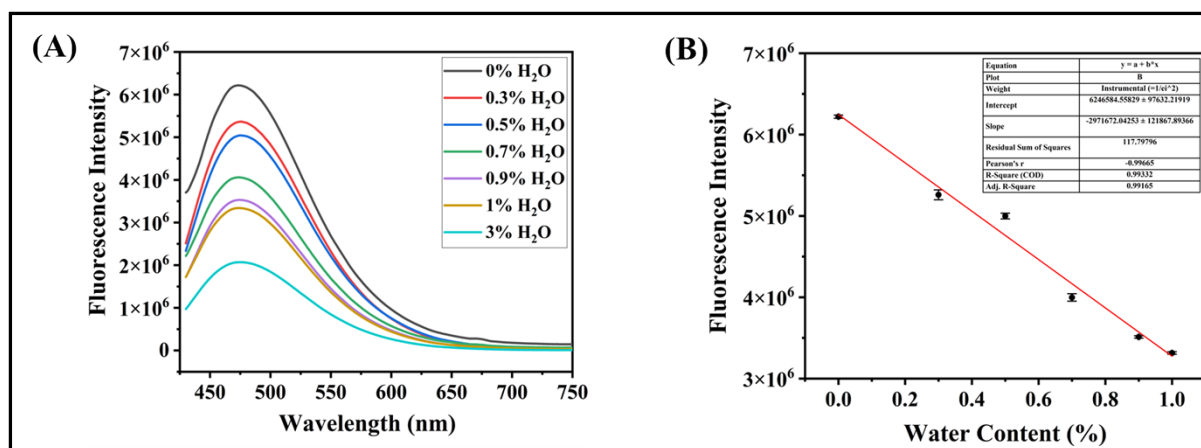

**Fig. S28** (A) Fluorescence emission spectra of chitosan thin film in THF solvent with increasing water content and (B) Plot of fluorescence intensity vs water content in THF.

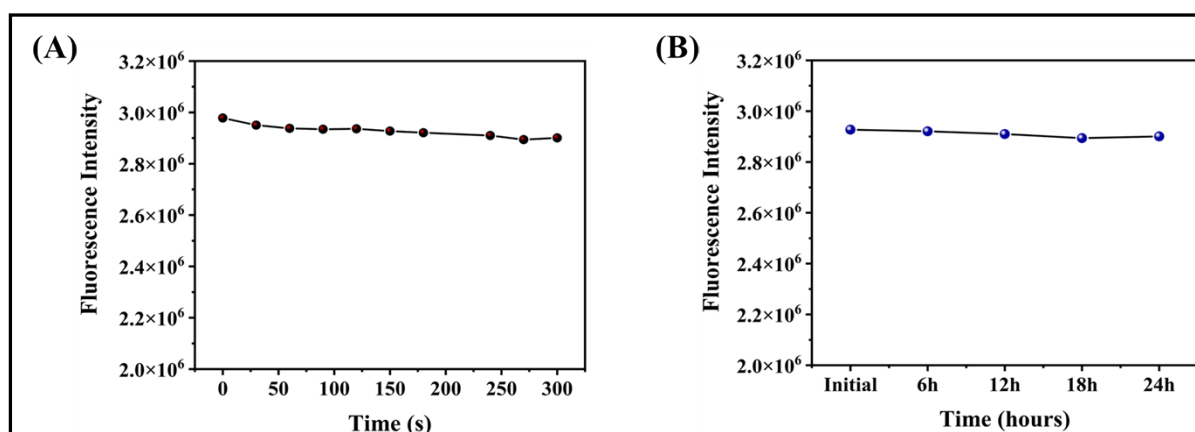

**Fig. S29** (A) Response time analysis of chitosan thin film in THF: water mixture at various time intervals, and (B) Stability studies of chitosan thin film THF-water solvent mixture.

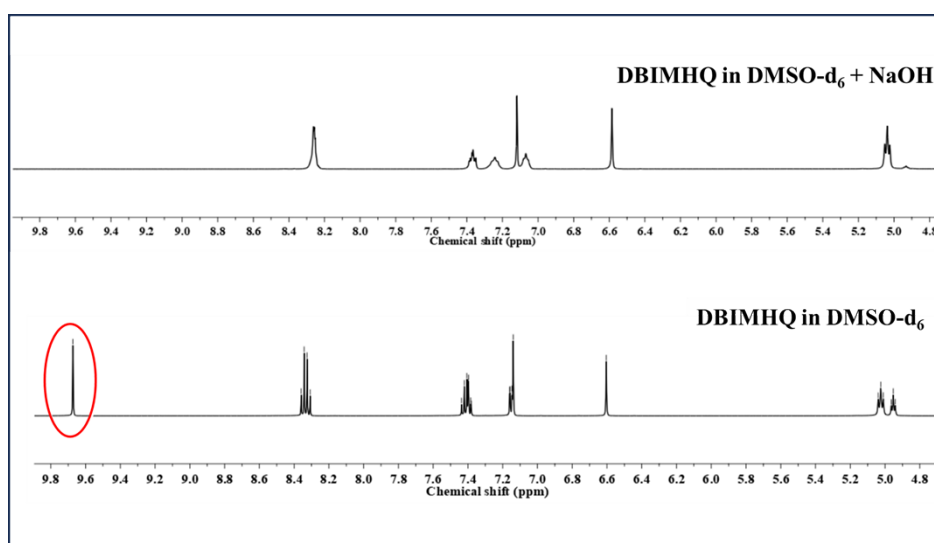

**Fig. S30**  $^1\text{H}$  NMR spectrum of DBIMHQ in the presence of NaOH.

**Table S3. Comparison of previous reports with DBIMHQ**

| Sl. No. | Sensor                                                                              | Solvent                                  | LOD (%)                                             | LOQ (%)                                             | Response (s) | References   |
|---------|-------------------------------------------------------------------------------------|------------------------------------------|-----------------------------------------------------|-----------------------------------------------------|--------------|--------------|
| 1       | 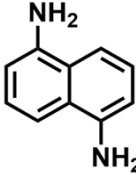   | ACN<br>THF                               | 0.08<br>0.13                                        | 0.24<br>0.40                                        | -            | 1            |
| 2       |    | ACN<br>Dioxane<br>DMSO<br>EtOH<br>THF    | 0.06246<br>0.18329<br>0.17478<br>0.39660<br>0.47389 | 0.20823<br>0.61097<br>0.58262<br>1.32201<br>1.57965 | -            | 2            |
| 3       |   | DMSO<br>DMF<br>ACN<br>EtOH               | 0.0220<br>0.0246<br>0.1404<br>0.1513                | -                                                   | <5s          | 3            |
| 4       |  | ACN<br>Dioxane<br>Acetone<br>DMSO<br>THF | 0.0019<br>0.007<br>0.0013<br>0.0068<br>0.0037       | -                                                   | ≤1.2s        | 4            |
| 5       | Karl Fischer Titration                                                              | Acetone<br>EtOH<br>THF<br>DMF            | 0.026<br>0.026<br>0.016<br>0.036                    | -                                                   | 30s          | 5            |
| 6       |  | THF<br>Acetone<br>ACN<br>DMSO<br>EtOH    | 0.0130<br>0.1743<br>0.1100<br>1.4271<br>1.6742      | 0.0435<br>0.5812<br>0.3668<br>4.7570<br>5.5807      | 30s          | Present Work |

## References

1. E. Kopcsik, P. Kun and M. Nagy, *Photochem*, 2025, **5**, 22.
2. R. AbhijnaKrishna, N. Vijay and S. Velmathi, *New J. Chem.*, 2022, **46**, 17903–17911.
3. J. T. Wang, Y. Y. Pei, S. F. Ren, M. Y. Yan, W. Luo, B. Zhang and Q. F. Li, *Spectrochim. Acta A: Mol. Biomol. Spectrosc.*, 2020, **229**, 117956.
4. Z. Zhang, Q. Liu, W. Wang, R. Shi, T. Jiang, J. Li, P. Jiang, H. Yu and Y. Qi, *Spectrochim Acta A Mol Biomol Spectrosc.*, 2024, **323**, 124880.
5. N. Dantan, W. Frenzel, and S. Kuppers, *Talanta*, 2000, **52**, 101-109.
